# Supplementary material for: A sensitivity-enhanced heterologous immunochromatographic assay based on a monoclonal antibody for the rapid detection of histamine in saury samples
Source: Royal Society of Chemistry journal article supplement (doi:10.1039/c5ra15925c), 2015-01-01
Supplement: c5ra15925c1.pdf [file c5ra15925c1.pdf]

**Supplemental information for “A sensitivity-enhanced heterologous  
immunochemical assay based on monoclonal antibody for  
the rapid detection of histamine in saury samples”**

Lin Luo,<sup>†</sup> Jin-Yi Yang,<sup>†</sup> Zhi-Li Xiao,<sup>†</sup> Zeng Dao-Ping,<sup>§</sup> Yong-Jun Li,<sup>‡</sup> Yu-Dong  
Shen,<sup>†</sup> Yuan-Ming Sun,<sup>†,\*</sup> Hong-Tao Lei,<sup>†</sup> Hong Wang,<sup>†</sup> Zhen-Lin Xu<sup>†,\*</sup>

<sup>†</sup> Guangdong Provincial Key Laboratory of Food Quality and Safety, South China  
Agricultural University, Guangzhou 510642, China

<sup>§</sup> Guangzhou Wanlian Biotechnologies Co. Ltd, Guangzhou 510670, China

<sup>‡</sup> Zhongshan Quality Supervision & Inspection Institute of Agricultural Products,  
Zhongshan, 528403, China

\* Corresponding author. No.483, Wushan Road, Tianhe District, Guangzhou, 510642,  
China. Tel.: +86 20 8528 3448; Fax: +86 20 8528 0270

E-mail: gzsyzyming@163.com (Y.M. Sun); jallent@163.com (Z.-L. Xu)

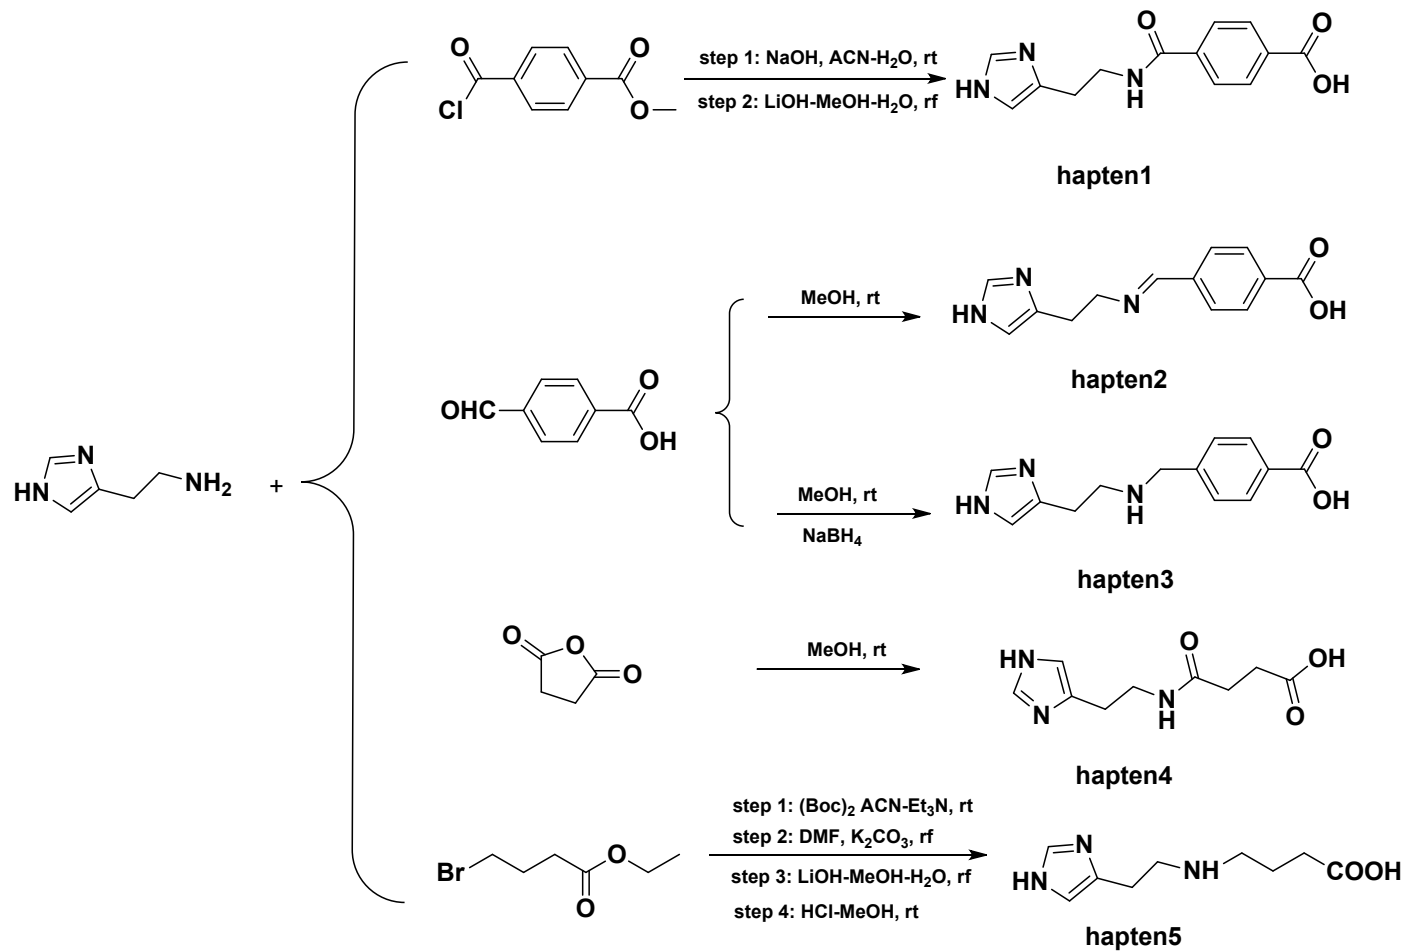

Fig. S1. Synthetic route for haptent1~5

### Synthetic procedures:

haptent1: *4-((2-(1H-imidazol-4-yl)ethyl)carbamoyl)benzoic acid*. Haptent1 was synthesized according to previous work [18]. ESI analysis (negative ion)  $m/z$  258  $[M-H]^-$ ;  $^1H$  NMR (400 MHz, Methanol- $d_4$ )  $\delta$  8.54 (d,  $J = 1.4$  Hz, 1H), 8.12–8.05 (m, 2H), 7.90–7.82 (m, 2H), 7.27 (d,  $J = 1.3$  Hz, 1H), 3.72 (t,  $J = 6.8$  Hz, 2H), 3.04 (t,  $J = 6.8$  Hz, 2H).

haptent2: *(E)-4-(((2-(1H-imidazol-4-yl)ethyl)imino)methyl)benzoic acid*. Histamine dihydrochloride (1.84 g, 10 mmol) and 4-formylbenzoic acid (1.5 g, 10 mmol) were dissolved in methanol, the resulting mixture was stirred for 1 h at room temperature. Then, the white precipitate was filtered off and washed with cold methanol, dried to yield haptent2 (19.6 g, 80%). ESI analysis (negative ion)  $m/z$  244  $[M-H]^-$ ;  $^1H$  NMR (600 MHz, DMSO- $d_6$ ) 8.37 (s, 1H), 7.98 (d,  $J=8.1$ , 2H), 7.80 (d,  $J=8.2$ , 2H), 7.51 (s, 1H), 6.76 (s, 1H), 3.83 (t,  $J=7.1$ , 2H), 2.85 (t,  $J=7.3$ , 2H).

haptent3: *4-(((2-(1H-imidazol-4-yl)ethyl)amino)methyl)benzoic acid*. Histamine dihydrochloride (1.84 g, 10 mmol) and sodium methoxide (1.08 g, 20 mmol) were dissolved in methanol, then 4-formylbenzoic acid (1.5 g, 10 mmol) was added to the resulting mixture under stirring. After 1 h,  $NaBH_4$  (0.37 g, 10 mmol) was added to the mixture, and the reaction proceeded another 0.5 h. Then the solvent was removed under rotoevaporation, the residue was purified on a silica gel column, using  $CHCl_3/MeOH/NH_4OH$  (10:5:1) as the eluent, and then crystallized from cold ethanol (10 mL) to afford haptent3 (1.68 g, 69%). ESI analysis (positive ion)  $m/z$  246  $[M+H]^+$ ;  $^1H$  NMR (600 MHz,  $D_2O$ )  $\delta =$  8.48 (d,  $J=1.2$ , 1H), 7.72 (d,  $J=8.1$ , 2H), 7.36 (d,  $J=8.2$ , 2H), 7.22 (s, 1H), 4.20 (s, 2H), 3.32 (t,  $J=7.6$ , 2H), 3.08 (t,  $J=7.6$ , 2H).

haptent4: *4-((2-(1H-imidazol-4-yl)ethyl)amino)-4-oxobutanoic acid*. Haptent4 was synthesized according to previous work [18]. ESI analysis (negative ion)  $m/z$  210  $[M-H]^-$ ;  $^1H$  NMR (600

MHz, D<sub>2</sub>O)  $\delta$  8.54 (s, 1H), 7.26 (s, 1H), 3.45 (t, J = 6.3 Hz, 2H), 2.89 (t, J = 6.4 Hz, 2H), 2.44–2.35 (m, 4H).

haptens: *4-((2-(1H-imidazol-4-yl)ethyl)amino)butanoic acid*. Haptens5 was synthesized according to previous work [18]. ESI analysis (negative ion) m/z 196 [M-H]<sup>-</sup>; <sup>1</sup>H NMR (600 MHz, Methanol-d<sub>4</sub>)  $\delta$  8.97 (s, 1H), 7.61 (s, 1H), 4.30–4.26 (m, 2H), 3.30–3.28 (m, 1H), 3.14 (t, J = 7.5 Hz, 2H), 2.45 (t, J = 7.2 Hz, 2H), 2.21–2.18 (m, 2H).

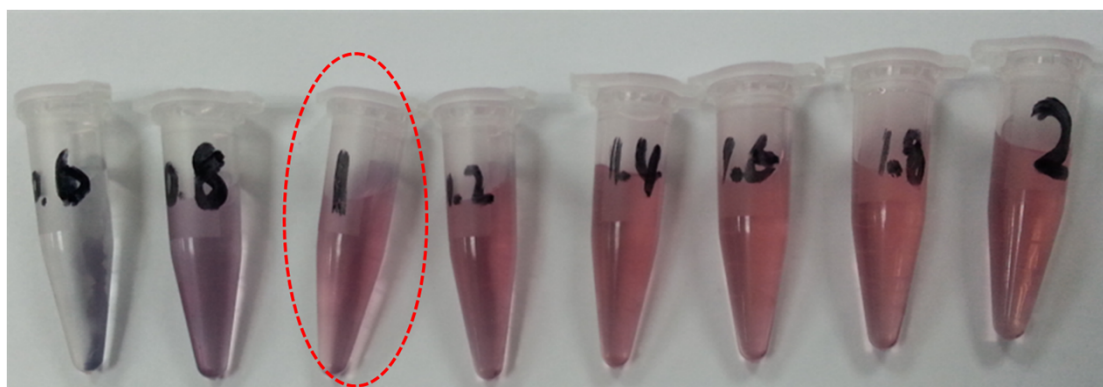

Fig.S2. Results of screening the minimum mAb amount needed for conjugating with GNPs. From left to right, 0.6, 0.8, 1.0, 1.2, 1.4, 1.6, 1.8, 2.0  $\mu$ L anti-NPHA mAb were added to 500  $\mu$ L of GNPs. The minimum amount mAb which can make GNPs solution free from color change to blue was considered as the minimum mAb amount needed for labeling.

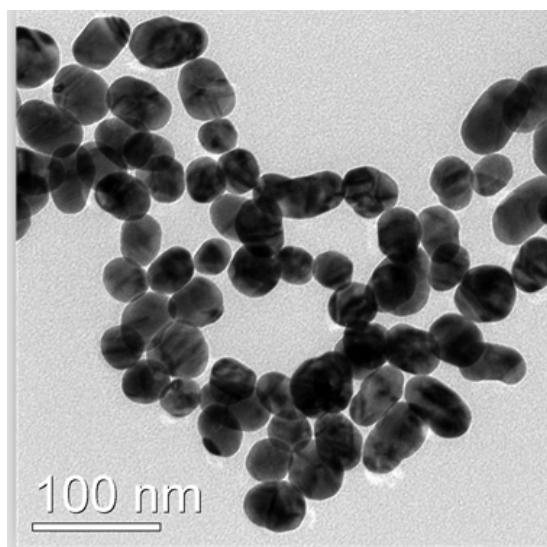

Fig. S3. TEM image of the prepared colloidal gold nanoparticles in this study

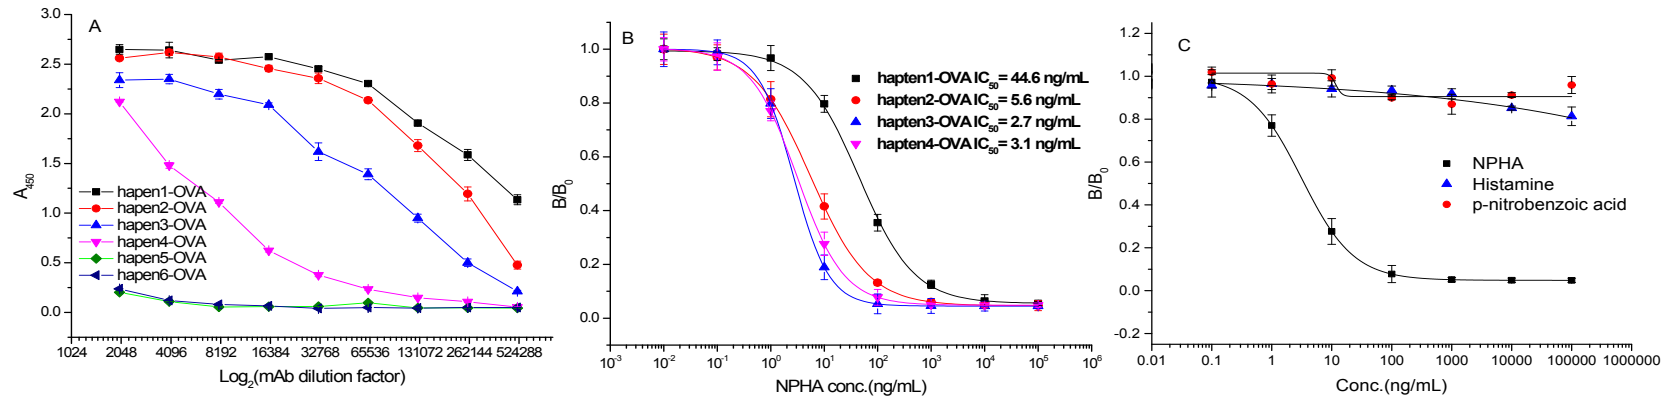

Fig. S4. (A) anti-NPHA mAb titer curve against each of the four coating antigens ( $n=3$ ). Each coating antigens was coated at  $0.5 \mu\text{g mL}^{-1}$ . Ordinate represents the absorbance value at 450 nm of wells containing serial diluted mAb (1:2000, 1:4000, 1:8000, 1:16000, 1:32000, 1:64000, 1:128000, 1:256000). (B). Dose-dependent competitive indirect ELISA curves for NPHA against each of the four effective coating antigens.  $B_0$  is the  $A_{450}$  of the well containing no NPHA; B is the  $A_{450}$  of the well containing certain amounts of NPHA. (C) The specificity of anti-NPHA mAb was tested by ic-ELISA under hapten4-OVA coating using NPHA, histamine and p-nitrobenzoic acid as competitor.

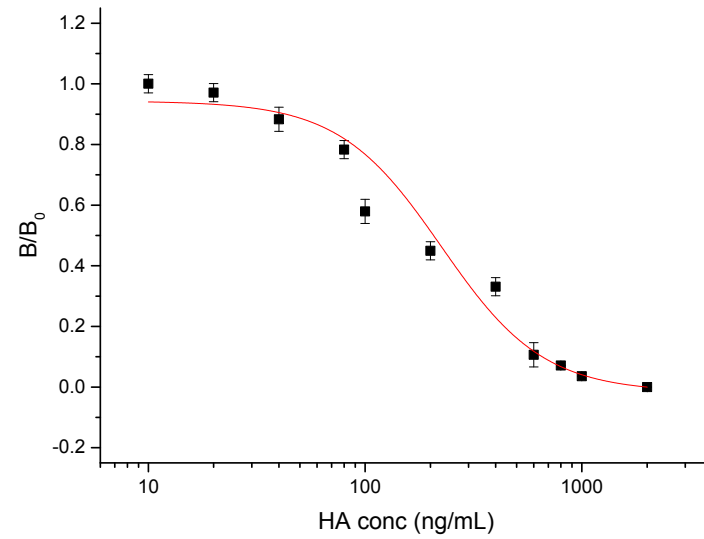

Fig. S5. Calibration curve for HA using ICA strip.  $A_T$  and  $A_C$  were color intensity of T line and C line recorded by strip reader, respectively. The  $A_T/A_C$  ratio of negative and positive samples were designated  $B_0$  and  $B_x$ . The calibration curve constructed by plotting the  $B_x/B_0$  ratio against the logarithm of HA concentration.

Table S1 Effects of Tween-20 contained in working solution on the colloidal gold immunochromatographic assay of HA

| Tween-20 content (%) in |        | NPHA standard concentration (ng mL <sup>-1</sup> ) |     |     |     |     |     |
|-------------------------|--------|----------------------------------------------------|-----|-----|-----|-----|-----|
|                         |        | 0                                                  | 20  | 50  | 100 | 200 | 400 |
| 0                       | T line | +++                                                | ++  | +±  | +   | ±   | -   |
|                         | C line | +++                                                | +++ | +++ | +++ | +++ | +++ |
| 0.01                    | T line | +++                                                | ++± | ++  | +±  | +   | ±   |
|                         | C line | +++                                                | +++ | +++ | +++ | +++ | +++ |
| 0.05                    | T line | +++                                                | +++ | ++± | ++  | +±  | +   |
|                         | C line | +++                                                | +++ | +++ | +++ | +++ | +++ |
| 0.1                     | T line | +++                                                | +++ | +++ | ++± | ++  | +±  |
|                         | C line | +++                                                | +++ | +++ | +++ | +++ | +++ |

+++: Red line appeared.

++±: Red line appeared but was weaker than +++.

++: Red line appeared but was weaker than ++±.

+±: Red line appeared but was weaker than ++.

+: Red line appeared but was weaker than +±.

±: Red line appeared but was weaker than +.

-: Red line did not appear.



Table S2 Optimization of  $\text{PO}_4^{3-}$  concentrations of working solution for the colloidal gold immunochromatographic assay of HA

| $\text{PO}_4^{3-}$ concentrations (M)<br>of PBS pH 7.4 |        | NPHA standard concentration ( $\text{ng mL}^{-1}$ ) |     |     |     |     |     |
|--------------------------------------------------------|--------|-----------------------------------------------------|-----|-----|-----|-----|-----|
|                                                        |        | 0                                                   | 20  | 50  | 100 | 200 | 400 |
| 0.01                                                   | T line | +++                                                 | ++  | +±  | +   | ±   | -   |
|                                                        | C line | +++                                                 | +++ | +++ | +++ | +++ | +++ |
| 0.02                                                   | T line | +++                                                 | ++  | +±  | ±   | -   | -   |
|                                                        | C line | +++                                                 | +++ | +++ | +++ | +++ | +++ |
| 0.05                                                   | T line | +++                                                 | ++  | ±   | -   | -   | -   |
|                                                        | C line | +++                                                 | +++ | +++ | +++ | +++ | +++ |
| 0.1                                                    | T line | ++±                                                 | ++  | +   | ±   | -   | -   |
|                                                        | C line | +++                                                 | +++ | +++ | +++ | +++ | +++ |

+++: Red line appeared.

++±: Red line appeared but was weaker than +++.

++: Red line appeared but was weaker than ++±.

+±: Red line appeared but was weaker than ++.

+: Red line appeared but was weaker than +±.

±: Red line appeared but was weaker than +.

-: Red line did not appear.

Table S3 Optimizaition of pH values of working solution for the colloidal gold immunochromatographic assay of HA

| pH values of 0.05 MPBS |        | NPHA standard concentration (ng mL <sup>-1</sup> ) |     |     |     |     |     |
|------------------------|--------|----------------------------------------------------|-----|-----|-----|-----|-----|
| pH 7.4                 |        | 0                                                  | 20  | 50  | 100 | 200 | 400 |
| 6.2                    | T line | +++                                                | ++  | +±  | +   | ±   | -   |
|                        | C line | +++                                                | +++ | +++ | +++ | +++ | +++ |
| 7.4                    | T line | +++                                                | ++  | ±   | -   | -   | -   |
|                        | C line | +++                                                | +++ | +++ | +++ | +++ | +++ |
| 8.2                    | T line | ++±                                                | ++  | ±   | -   | -   | -   |
|                        | C line | +++                                                | +++ | +++ | +++ | +++ | +++ |
| 9.0                    | T line | ++                                                 | +±  | ±   | -   | -   | -   |
|                        | C line | +++                                                | +++ | +++ | +++ | +++ | +++ |
| 10.0                   | T line | +±                                                 | +   | -   | -   | -   | -   |
|                        | C line | +++                                                | +++ | +++ | +++ | +++ | +++ |

+++ : Red line appeared.

++± : Red line appeared but was weaker than +++.

++ : Red line appeared but was weaker than ++±.

+± : Red line appeared but was weaker than ++.

+ : Red line appeared but was weaker than +±.

± : Red line appeared but was weaker than +.

- : Red line did not appear.

Table S4. Effects of acetonitrile concentration in working solution on the colloidal gold immunochromatographic assay of HA

| Acetonitrile concentration<br>(%) in working solution |        | NPHA standard concentration (ng mL <sup>-1</sup> ) |     |     |     |     |     |
|-------------------------------------------------------|--------|----------------------------------------------------|-----|-----|-----|-----|-----|
|                                                       |        | 0                                                  | 20  | 50  | 100 | 200 | 400 |
| 0                                                     | T line | +++                                                | ++  | ±   | -   | -   | -   |
|                                                       | C line | +++                                                | +++ | +++ | +++ | +++ | +++ |
| 2                                                     | T line | +++                                                | ++  | +±  | ±   | -   | -   |
|                                                       | C line | +++                                                | +++ | +++ | +++ | +++ | +++ |
| 5                                                     | T line | +++                                                | ++± | ++  | +   | ±   | -   |
|                                                       | C line | +++                                                | +++ | +++ | +++ | +++ | +++ |
| 10                                                    | T line | ++±                                                | ++± | ++± | ++  | +±  | +   |
|                                                       | C line | +++                                                | +++ | +++ | +++ | +++ | +++ |
| 20                                                    | T line | ++                                                 | ++  | ++  | ++  | +±  | +   |
|                                                       | C line | +++                                                | +++ | +++ | +++ | +++ | +++ |

+++: Red line appeared.

++±: Red line appeared but was weaker than +++.

++: Red line appeared but was weaker than ++±.

+±: Red line appeared but was weaker than ++.

+: Red line appeared but was weaker than +±.

±: Red line appeared but was weaker than +.

-: Red line did not appear.
